# Supplementary material
Source: PubMed Central journal article supplement (PMC7336882)
Supplement: Supp_Table1.pdf [file Supp_Table1.pdf]

**Supplemental Table 1: Psychotropic Medication Use Over First Year Post-TBI**

| Medication Category                                 | Brand (Generic) Medication Name |
|-----------------------------------------------------|---------------------------------|
| Anti-psychotics                                     | Risperdal (risperidone)         |
|                                                     | Seroquel (quetiapine)           |
|                                                     | Zyprexa (olanzapine)            |
| Mood Stabilizers                                    | Depakene (valproic acid)        |
|                                                     | Depakote (divalproex sodium)    |
|                                                     | Neurontin (Gabapentin)          |
| Anti-depressants                                    | Celexa (citalopram)             |
|                                                     | Cymbalta (duloxetine)           |
|                                                     | Desyrel (trazadone)             |
|                                                     | Effexor (venlafaxine)           |
|                                                     | Elavil (amitriptyline)          |
|                                                     | Lexapro (escitalopram)          |
|                                                     | Prozac (fluoxetine)             |
|                                                     | Remeron (mirtazapine)           |
|                                                     | Wellbutrin (bupropion)          |
| Zoloft (sertraline)                                 |                                 |
| Anti-panic, Anti-obsessive, and Anti-Anxiety Agents | Ativan (lorazepam)              |
|                                                     | Klonopin (clonazepam)           |
|                                                     | Librium (chlordiazepoxide)      |
|                                                     | Valium (diazepam)               |
| Stimulants                                          | Xanax (alprazolam)              |
|                                                     | Adderall (amphetamine)          |
|                                                     | Ritalin (methylphenidate)       |
| Opioid Analgesics                                   | Strattera (atomoxetine)         |
|                                                     | MS Contin (Morphine)            |
|                                                     | Percocet (Oxycodone)            |
|                                                     | Ultram (Tramadol)               |
|                                                     | Vicodin (Hydrocodone)           |

The percentage of individuals that were both high in APA and AHA IgM TRAJ groups, and vice versa, is unclear. A table indicating this would be helpful.

**RESPONSE:** The suggested table has been added to the main report 'Autoantibody group-based trajectory analysis' (refer to new **Table 5, lines 519-521**). This table reports concordance between AHA and APA IgM TRAJ groups among n=124 individuals for which TRAJ group were formulated. Below is a summary of the relationships between TRAJ groups which are significantly associated ( $X^2=4.3780$ ,  $p=0.0364$ ). Those with lower levels of APA IgM also tended to express lower AHA IgM levels and vice versa, although concordance was not perfect.

**Table 5: Auto-antibody Group-Based Trajectory Analysis Concordance Frequencies**

|                   | Low AHA IgM TRAJ | High AHA IgM TRAJ |
|-------------------|------------------|-------------------|
| Low APA IgM TRAJ  | 33 (26.61%)      | 19 (15.32%)       |
|                   | 63.46%#          | 36.54%#           |
|                   | 50.77%*          | 32.20%*           |
| High APA IgM TRAJ | 32 (25.81%)      | 40 (32.26%)       |
|                   | 44.44%#          | 55.56%#           |
|                   | 49.23%*          | 67.80%*           |

#Indicates Row Percentages (APA TRAJ%)

\*Indicates Column Percentages (AHA TRAJ%)

() Parentheses indicate group percentages. (overall cohort)

**Figures 5 and 6** could be combined in a single figure. Main group effects can be described in text.

**RESPONSE:** See new **Figure 6** which consolidates previously named **Figures 5 and 6**. As suggested main group effects have been described in results section 'APA and AHA relationships to TBI and PHH' (**lines 488-499**).
